# Supplementary material
Source: PubMed Central journal article supplement (PMC6668665)
Supplement: jci-129-126366-s297.pdf [file jci-129-126366-s297.pdf]

**Title:** CIC-DUX4 oncoprotein drives sarcoma metastasis and tumorigenesis via distinct regulatory programs

**Authors:** Ross A. Okimoto, Wei Wu, Shigeki Nanjo, Victor Olivas, Yone K. Lin, Rovingaile Kriska Ponce, Rieko Oyama, Tadashi Kondo, and Trever G. Bivona

Supplementary material contains the supplemental methods, 8 figures, and 4 tables.

## **Supplemental Methods.**

**Orthotopic and subcutaneous soft tissue xenografts in immunodeficient mice.** Six to eight-week old female SCID mice were purchased from Taconic (Germantown, NY).

To prepare cell suspensions for quadriceps injection, adherent tumor cells were briefly trypsinized, quenched with 10% FBS DMEM media and resuspended in PBS. Cells were pelleted again and mixed with Matrigel matrix (BD Bioscience 356237) on ice for a final concentration of  $1.0 \times 10^5$  cells/ $\mu$ l. The Matrigel-cell suspension was transferred into a 1ml syringe and remained on ice until the time of implantation.

For orthotopic injection, mice were placed in the right lateral decubitus position and anesthetized with 2.5% inhaled isoflurane. A 0.5 cm surgical incision was made along the posterior medial line of the left hindlimb, fascia and adipose tissue layers were dissected and retracted to expose the quadriceps femoris muscle. A 30-gauge hypodermic needle was used to advance through the muscular capsule. For all cell lines, care was taken to inject  $10 \mu$ l ( $1.0 \times 10^6$  cells) of cell suspension directly into the left quadriceps femoris. The needle was rapidly withdrawn and mice were observed for bleeding. Visorb 4/0 polyglycolic acid sutures were used for primary wound closure of the fascia and skin layer. Mice were observed post-procedure for 1-2 hours and body weights and wound healing were monitoring weekly. For subcutaneous xenotransplantation,  $3.0 \times 10^6$  NCC\_CDS1\_X3 cells were resuspended in 50% PBS/50% Matrigel matrix and injected into the flanks of immunodeficient mice.

**In-vivo bioluminescence imaging.** Mice were imaged at the UCSF Preclinical Therapeutics Core starting on post-injection day 7 with a Xenogen IVIS 100 bioluminescent imaging system. Prior to imaging, mice were anesthetized with isoflurane and intraperitoneal injection (IP) of 200 $\mu$ l of D-Luciferin at a dose of 150mg/kg body weight was administered. Weekly monitoring of bioluminescence of the engrafted hindlimb tumors was performed until week 5. Radiance was calculated automatically using Living Image Software following demarcation of the left hindlimb (ROI). The radiance unit of photons/sec/cm<sup>2</sup>/sr is the number of photons per second that leave a square centimeter of tissue and radiate into a solid angle of one steradian (sr).

**Ex-vivo bioluminescence imaging.** Mice were injected IP with 200  $\mu$ l (150mg/kg) of D-Luciferin and subsequently sacrificed at 5 weeks, en-bloc resection of the heart and lungs was performed. The heart was removed and the lungs were independently imaged. Imaging was performed in a 12 well tissue culture plate with Xenogen IVIS 100 bioluminescent imaging.

**Cell lines and culture reagents.** Cell lines were cultured as recommended by the American Type Culture Collection (ATCC). NIH-3T3, 293T, A673, RD, and RH30 cells were obtained from ATCC. NCC\_CDS1\_X1 and NCC\_CDS\_X3 were obtained from Tadashi Kondo at the National Cancer Center, Tokyo, Japan. The presence of the CIC-DUX4 fusion was confirmed through RNAseq analysis using the “grep” command as previously described (Panagopoulos et al, Plos One 2014). All cell lines were maintained at 37 °C in a humidified atmosphere at 5%

CO<sub>2</sub> and grown DMEM 1640 media supplemented with 10% FBS, 100 IU/ml penicillin and 100ug/ml streptomycin. Dinaciclib, palbociclib, SNS-032 were purchased from SelleckChem.

**Gene knockdown and over-expression assays.** All shRNAs were obtained from Sigma Aldrich. Sequences for individual shRNAs are as follows:

shETV4a: catalog # TRCN0000055132.

shETV4b: catalog # TRCN0000295522.

shCCNE1a: catalog # TRCN0000222722

shCCNE1b: catalog # TRCN0000077776

shCCNE1b: catalog # TRCN0000077777

ON-TARGET plus ETV4, ETV1, ETV5, Scramble, CDK1, CDK2, CDK7, CDK9, CCNE1, and CCNE2 siRNA were obtained from GE Dharmacon and transfection performed with Dharmafect transfection reagent. The HA-tagged CIC-DUX4 plasmid was obtained from Takuro Nakamura (The Cancer Institute of Japanese Foundation for Cancer Research, Tokyo, Japan). Sequence verification was performed using sanger sequencing. The lentiviral GFP-Luciferase vector was a kind gift from Michael Jensen (Seattle Children's Research Institute, Seattle, WA). Fugene 6 transfection reagent was used for all virus production and infection was carried out with polybrene.

**Chromatin immunoprecipitation and PCR.** CIC null cells (H1975 M1) were transfected with either GFP control, wild-type CIC, or CIC-DUX4 for 48 hours. SimpleCHIP Enzymatic Chromatin IP Kit (Cell Signaling Technology) was used

with IgG (Cell signaling Technology) and CIC (Acris) antibodies per the manufactures protocol.

ETV4 PCR primers were previously described (Okimoto et al., Nature Genetics 2016). The ETV4 primer sequences were as follows:

ETV4\_Foward 5'-CGCATCAGACCCAAGACCGTGG-3'

ETV4\_Reverse 5'-CCGGAGAGTCGTCCGGCCTGG-3'

CCNE1 PCR primers were designed to flank a tandem TGAATGAA/TGAATGAA sequence from positions -914 to -898 in the CCNE1 promoter. The primer sequences were as follows:

CCNE1\_1F CGTCTCGGCCTCCCACAATGCTGGG and

CCNE1\_1R CGCGCCTGTGCCTTGGCCTAGAACC.

### **Chromatin immunoprecipitation – RNA-Seq (ChIPseq) analysis**

CIC-DUX4 immunoprecipitation was performed using NCC\_CDS\_X1 cells. SimpleCHIP Enzymatic Chromatin IP Kit (Cell Signaling Technology) was used with IgG (Cell signaling Technology) and CIC (Acris) antibodies per the manufactures protocol. Paired-end 150bp (PE150) sequencing on a HiSeq platform was subsequently performed. ChIP-Seq peak calls were identified through Mode-based Analysis of ChIP-Seq (MACS).

**Luciferase promoter assay.** 293T cells were obtained from ATCC. Cells were grown in Dulbecco's modified Eagle Medium (DMEM), supplemented with 10% FBS, 100 IU/ml penicillin and 100ug/ml streptomycin in a 5% CO<sub>2</sub> atmosphere.

Cells were split into a 96 well plate to achieve 50% confluence the day of transfection. LightSwitch luciferase assay system (SwitchGear Genomics S720355) was used per the manufactures protocol. Briefly, a mixture containing FuGENE 6 transfection reagent, 50ng Luciferase GoClone *CCNE1* promoter (#S720355) plasmid DNA, 50ng of either control (empty) vector or CIC-DUX4 or wild-type CIC was added to each well. All transfections were performed in quintuplicate.

**Western blot analysis.** All immunoblots represent at least two independent experiments. Adherent cells were washed and lysed with RIPA buffer supplemented with proteinase and phosphatase inhibitors. Proteins were separated by SDS-PAGE, transferred to Nitrocellulose membranes, and blotted with antibodies recognizing: CIC (Acris/Origene AP50924PU-N), GFP (Cell Signaling #2956), HSP90 (Cell Signaling #4877), ETV4 (Lifespan LS-B1527), CCNE1 (Cell Signaling #20808), PARP (Cell Signaling #9532), Phosphor-RB (Cell Signaling), Actin (Sigma Clone AC-74), HA-tag (Cell Signaling #2367).

### **Real-Time Quantitative Polymerase Chain Reaction (RT-Q-PCR)**

Isolation and purification of RNA was performed using RNeasy Mini Kit (Qiagen). 500 ng of total RNA was used in a reverse transcriptase reaction with the SuperScript III first-strand synthesis system (Invitrogen). Quantitative PCR included four replicates per cDNA sample. Human (*CDK1*, *CDK2*, *CDK7*, *CDK9*, *CCNE1*, *CCNE2*, *ETV1*, *ETV4*, *ETV5*, *GAPDH*, and *TBP*) and mouse (*CCNE1*, *CCNE2*, and *GAPDH*) were amplified with Taqman gene expression assays (Applied Biosystems). Expression data was acquired using an ABI Prism 7900HT

Sequence Detection System (Applied Biosystems). Expression of each target was calculated using the  $2^{-\Delta\Delta Ct}$  method and expressed as a relative mRNA expression.

**Transwell migration and invasion assays.** RPMI with 10% FBS was added to the bottom well of a trans-well chamber.  $2.5 \times 10^4$  cells resuspended in serum free media was then added to the top 8  $\mu$ M pore matrigel coated (invasion) or non-coated (migration) trans-well insert (BD Biosciences). After 20 hours, non-invading cells on the apical side of inserts were scraped off and the trans-well membrane was fixed in methanol for 15 minutes and stained with Crystal Violet for 30 minutes. The basolateral surface of the membrane was visualized with a Zeiss Axioplan II immunofluorescent microscope at 10X. Each trans-well insert was imaged in five distinct regions at 10X and performed in triplicate. % invasion was calculated by dividing the mean # of cells invading through Matrigel membrane / mean # of cells migrating through control insert.

**Xenograft tumors.** Subcutaneous xenografts were explanted on day 4 of treatment. Tumor explants were immediately immersed in liquid nitrogen and stored at -80 degrees. Tumors were disrupted with a mortar and pestle, followed by sonication in RIPA buffer supplemented with proteinase and phosphatase inhibitors. Proteins were separated as above. Antibodies to PARP and phosphor-RB were both from Cell Signaling.

**Establishment of a CIC responsive gene set and identification of CIC-DUX4 target genes.** A publicly curated Affymetrix mRNA dataset (GSE60740) of 14

CIC-DUX4 tumors, 7 EWSR1-NFATc2 tumors, and a CIC-DUX4 expressing cell line (IB120) expressing either shRNA's targeting CIC-DUX4 or control was used to generate a list of CIC-DUX4 responsive genes. Notably, the entire dataset was profiled on the same Affymetrix Human Genome U133 Plus 2.0 array, enabling a direct comparison between tumor types. We first independently compared IB120 cells expressing either EV control to each individual shRNA targeting the CIC-DUX4 fusion (shCIC-DUX4a and shCICDUX4b). Using  $\log_{2}FC < -2$  and  $FDR < 0.05$ , we identified 409 (shCIC-DUX4a) and 205 (shCIC-DUX4b) downregulated genes, respectively. We then generated a shared gene list ( $N = 165$ ) of downregulated genes that we referred to as "CIC-DUX4 responsive genes". We then used the CIC-DUX4 responsive gene set to perform functional clustering with Database for Annotation, Visualization, and Integrated Discovery (DAVID). We performed a similar analysis using  $\log_{2}FC > 2$  and  $FDR < 0.05$  to identify 286 (shCIC-DUX4a) and 168 (shCIC-DUX4b) upregulated genes, respectively. There were 105 upregulated genes that were shared between these two datasets.

Using the CIC-DUX4 responsive gene set, we generated a gene expression heat map comparing: 1) IB120 cells expressing control vector and; 2) the two independent shRNAs targeting CIC-DUX4; 3) the 14 CIC-DUX4 patient derived tumors and; 4) the 7 EWSR1-NFATc2 tumors. Hierarchical clustering was performed using the differentially expressed CIC-DUX4 responsive gene set. We performed a similar hierarchical comparison of PAX3-FOXO1 positive cell lines (RH30) to CIC-DUX4 positive NCC\_CDS\_X1 cells as documented above. The PAX3-FOXO1 (RH30) and CIC-DUX4 (NCC\_CDS\_X1) cells were sequenced on the same RNAseq platform, enabling a direct comparison between the gene sets.



To identify putative CIC-DUX4 target genes, we surveyed all 165 CIC responsive genes for the CIC-binding motifs (TG/CAATGA/GA) within -2000bp and +150bp of the transcriptional start site. 43 of the 165 genes contained the CIC-binding motif. Human promoter sequences were downloaded from eukaryotic promoter database (<http://epd.vital-it.ch/>).

**Cell cycle analysis.** To determine the effect of CIC-DUX4 expression on cell cycle, NIH-3T3 cell lines were cultured to ~70% confluence and transfected with CIC-DUX4 or a GFP control vector for 48 hours. Cells were trypsinized and fixed in ice cold ethanol for 10 minutes and subsequently stained with propidium iodide (PI) solution (Sigma Aldrich) at room temperature for 15 minutes. Cells were analyzed on a BD LSRII flow cytometer.

**Statistical analysis.** Experimental data are presented as mean +/- SEM. P-values derived for all in-vitro experiments were calculated using two-tailed Student's t test or one-way ANOVA. A P-value <0.05 was considered statistically significant.

**Study approval.** For tumor xenograft studies, including orthotopic and subcutaneous models, specific pathogen-free conditions and facilities were approved by the American Association for Accreditation of Laboratory Animal Care. Surgical procedures were reviewed and approved by the UCSF Institutional Animal Care and Use Committee (IACUC), protocol #AN107889-03A.

Supplemental Figure 1. CIC-DUX4 promotes invasion and metastasis through ETV4

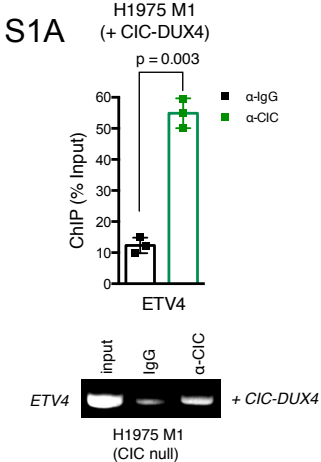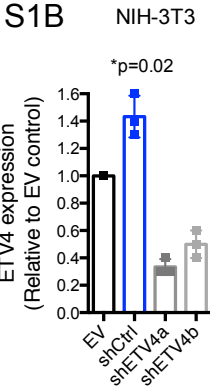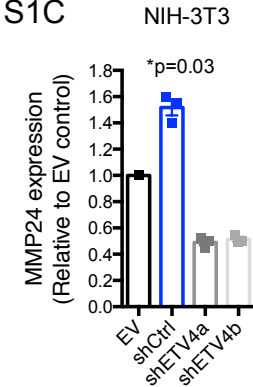

**Supplemental Figure 1. CIC-DUX4 promotes invasion and metastasis through ETV4**

A) ChIP-PCR from H1975 M1 (CIC wild-type null) cells reconstituted with CIC-DUX4 showing CIC-DUX4 occupancy on the *ETV4* promoter. ETV4 (B) and MMP24 (C) protein expression in NIH-3T3 cells expressing either EV or CIC-DUX4 with shCtrl, shETV4a, or shETV4b. Performed in triplicate and quantified using Image J software.

Supplemental Figure 2. CIC-DUX4 regulates cell-cycle progression and tumor growth.

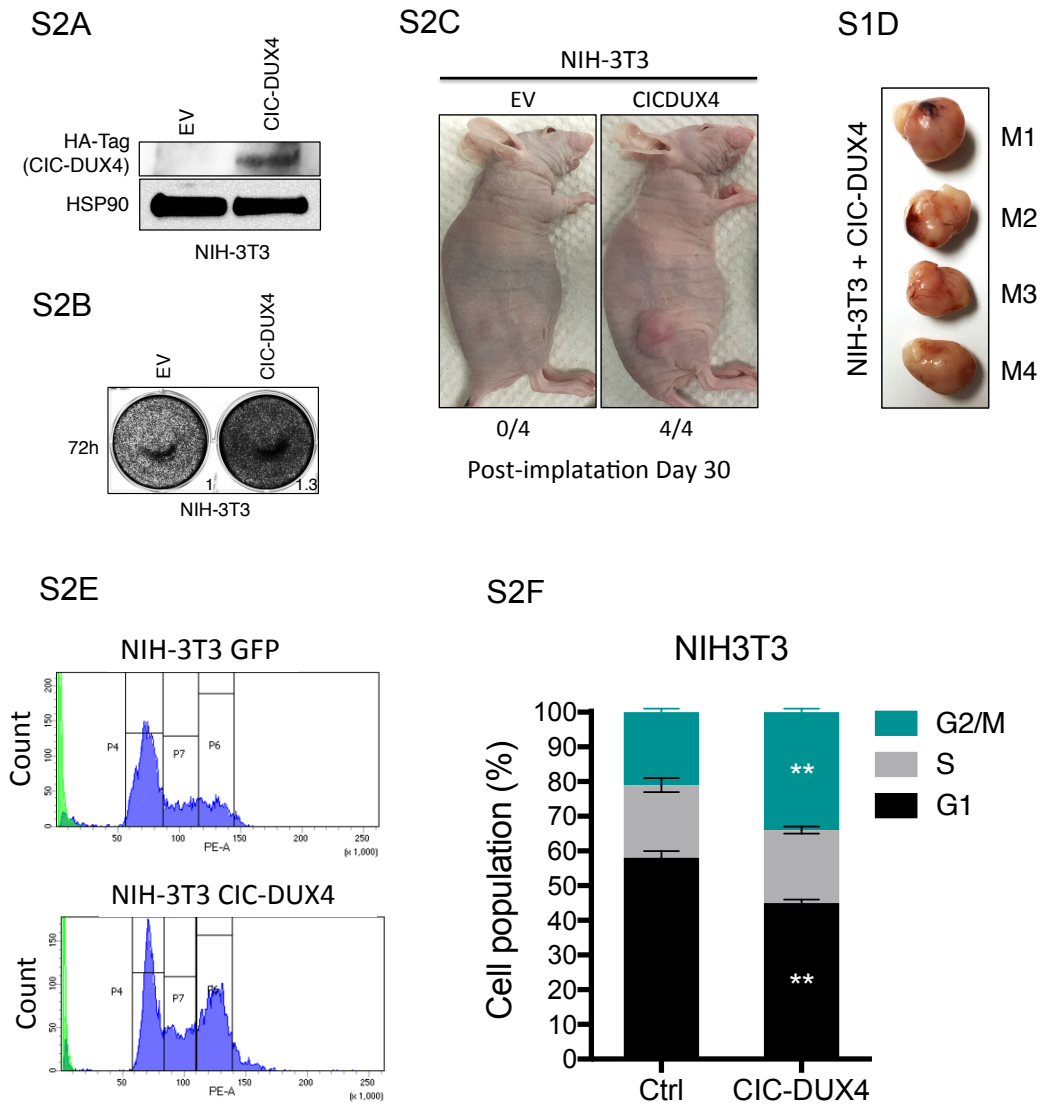

**Supplemental Figure 2. CIC-DUX4 regulates cell-cycle progression and tumor growth**

A) Immunoblot of CIC-DUX4 (HA-tag) and HSP90 in NIH-3T3 cells. B) Crystal violet assay comparing NIH-3T3 cells expressing either EV control or CIC-DUX4. C) Subcutaneously implanted NIH-3T3 cells expressing either EV control (n=4) or CIC-DUX4 (n=4). D) Tumor explants from mice in S2C. E) Cell-cycle profiles of NIH-3T3 cells expressing GFP control (top) or CIC-DUX4 (bottom). F) Cell-cycle distribution of NIH-3T3 cells expressing either EV control or CIC-DUX4 alone. Performed in triplicate. \*\*p-value = <0.005. Error bars represent SEM.

Supplemental Figure 3. CCNE1 inhibition decreases tumor growth in CIC-DUX4 expressing cells.

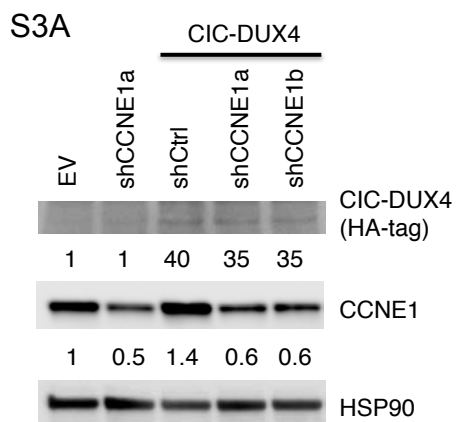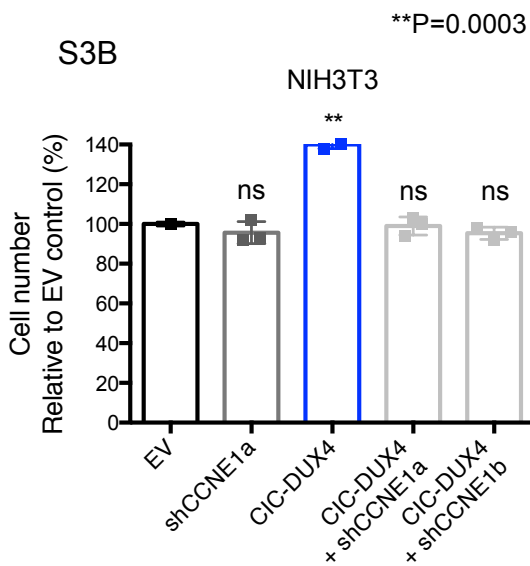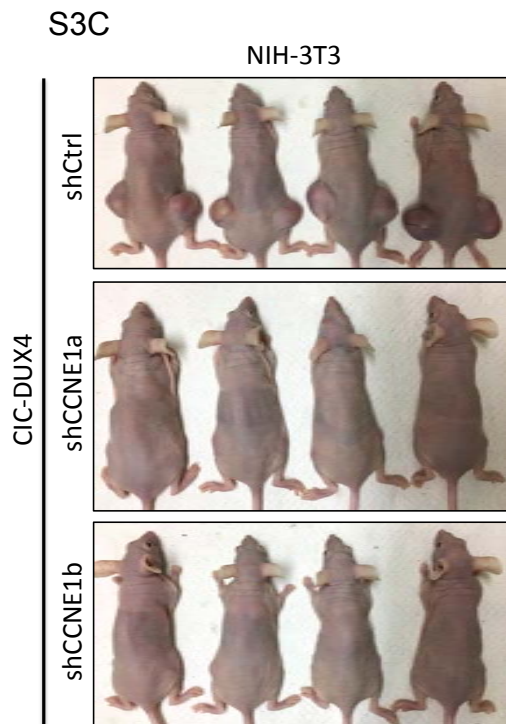

**Supplemental Figure 3. CCNE1 inhibition decreases tumor growth in CIC-DUX4 expressing cells**

A) Immunoblot of CIC-DUX4 (HA-Tag), CCNE1, and HSP90 in NIH-3T3 cells. B) Relative cell number of NIH-3T3 cells expressing either EV, shCCNE1a, CIC-DUX4 with or without shCCNE1a or shCCNE1b. \*\*p-value = 0.0003. C) Subcutaneously implanted NIH-3T3 cells expressing CIC-DUX4 and either shCtrl, shCCNE1a, or shCCNE1b.

Supplemental Figure 4. ETV4, but not ETV1 or ETV5 controls CIC-DUX4 mediated invasion.

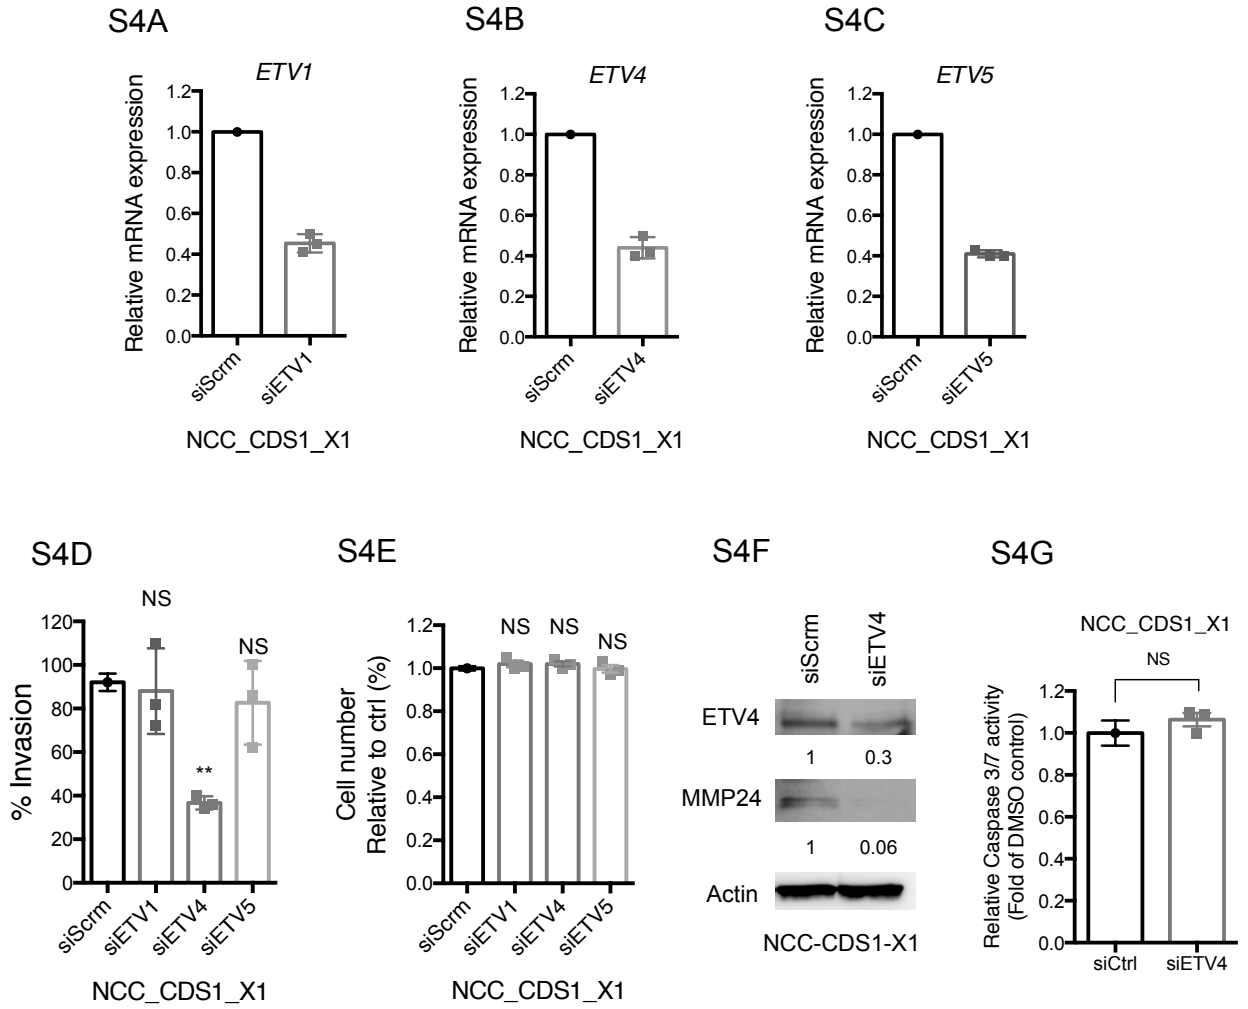



**Supplement Figure 4. ETV4, but not ETV1 or ETV5 controls CIC-DUX4 mediated invasion**

Relative *ETV1* (A), *ETV4* (B), and *ETV5* (C) mRNA expression in NCC\_CDS1\_X1 cells expressing either siETV1, siETV4, and siETV5 compared to siScrm. Performed in triplicate. Error bars represent SEM. D) Transwell invasion assay comparing NCC\_CDS1\_X1 cells expressing either siScrm, siETV1, siETV4, and siETV5. Performed in triplicate. Error bars represent SEM. E). Relative cell number of NCC\_CDS1\_X1 cells expressing either siScrm, siETV1, siETV4, and siETV5. Performed in triplicate. Error bars represent SEM. F) Immunoblot of ETV4 and MMP24 from NCC\_CDS1\_X1 cells expressing either siScrm control or siETV4. G) Relative caspase 3/7 activity in NCC\_CDS1\_X1 cells expressing either siScrm control or siETV4. Performed in triplicate. Error bars represent SEM.

Supplemental Figure 5. Pharmacologic inhibition of CDK2 with SNS-032 induces apoptosis in CIC-DUX4 expressing cells.

S5A

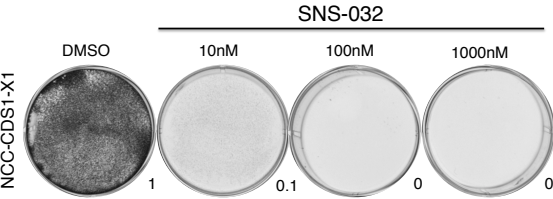

S5B

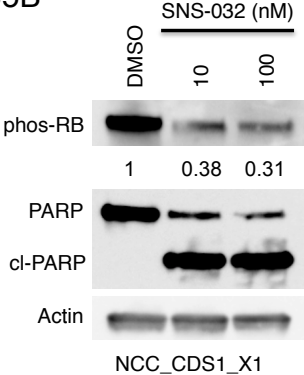

S5C

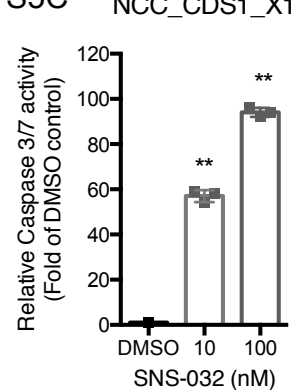

S5D

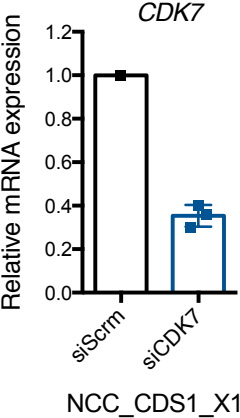

S5E

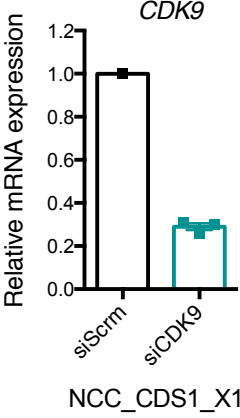

S5F

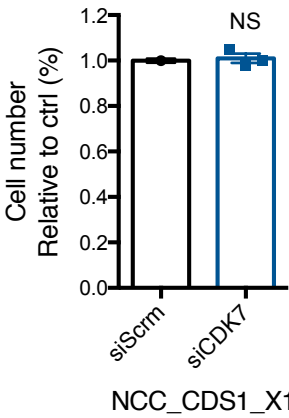

S5G

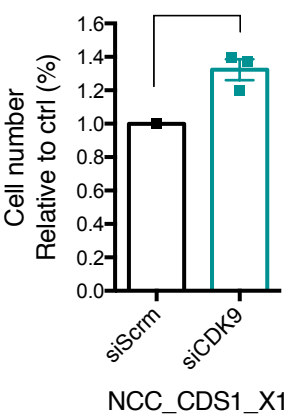

**Supplemental Figure 5. Pharmacologic inhibition of CDK2 with SNS-032 induces apoptosis in CIC-DUX4 expressing cells**

A) 72 hour crystal violet assay of NCC\_CDS1\_X1 cells treated with SNS-032. B) immunoblot of phosphorylated-Rb, PARP, and Actin from NCC\_CDS\_X1 cells treated with SNS-032 or DMSO. C) Relative caspase 3/7 activity in NCC\_CDS1\_X1 cells treated with SNS-032 or DMSO. \*\*p-value < 0.0001, one-way ANOVA. Relative *CDK7* (D) and *CDK9* (E) mRNA expression in NCC\_CDS1\_X1 cells expressing either siScrm control, siCDK7, or siCDK9 respectively. Performed in triplicate. Error bars represent SEM. F) Relative cell number of NCC\_CDS\_X1 cells expressing either siScrm or siCDK7. Performed in triplicate. Error bars represent SEM. G) Relative cell number of NCC\_CDS1\_X1 cells expressing either siScrm or siCDK9. Performed in triplicate. Error bars represent SEM. P-values calculated by Student's T-test.

Supplemental Figure 6. The CCNE-CDK2 complex is a specific therapeutic target in CIC-DUX4 tumors.

S6A

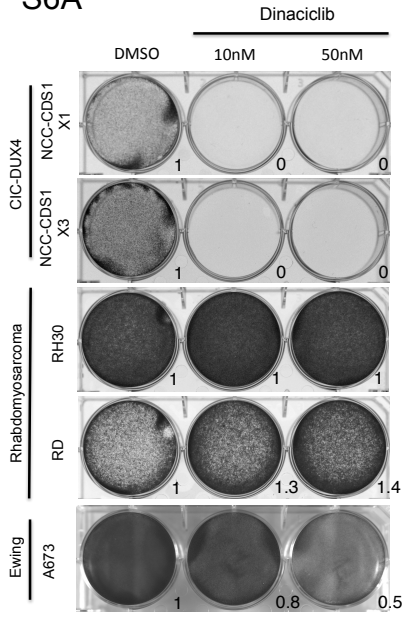

S6B

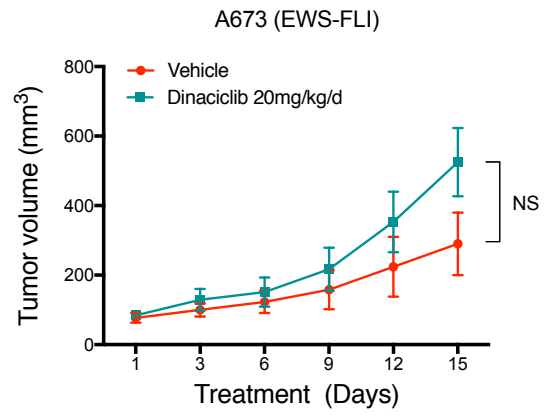

S6C

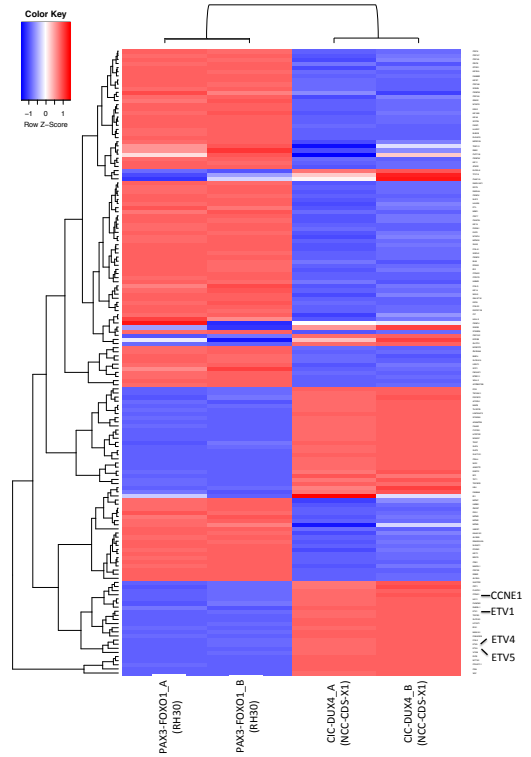

**Supplemental Figure 6. The CCNE-CDK2 complex is a specific therapeutic target in CIC-DUX4 tumors**

A) 72 hour crystal violet assay of CIC-DUX4 (NCC\_CDS1\_X1 and NCC\_CDS1\_X3), rhabdomyosarcoma (RD and RH30), Ewing sarcoma (A673) cells treated with vehicle or dinaciclib. B) Subcutaneously implanted Ewing sarcoma (A673) cells treated with either vehicle (n=6) or dinaciclib (n=6). Error bars represent SEM. C) Heatmap comparing 165 CIC-DUX4 activated genes identified in CIC-DUX4 expressing NCC-CDS1-X1 cells vs PAX3-FOXO1 containing RH30 cells. CCNE1, ETV1, ETV4, and ETV5 are magnified.

Supplemental Figure 7. Genetic inhibition of the CCNE-CDK2 complex decreases CIC-DUX4 tumor growth.

S7A

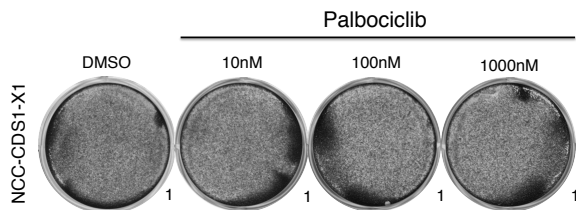

S7B

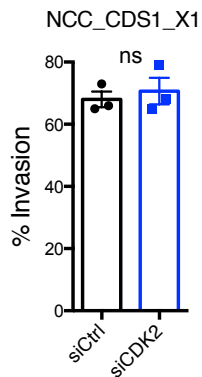

S7C

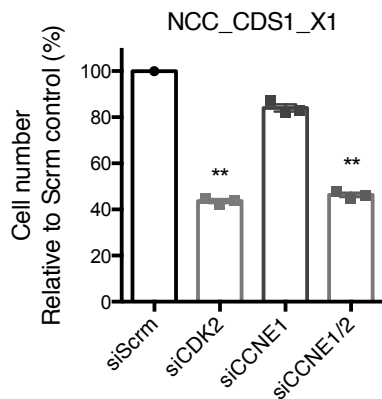

S7D

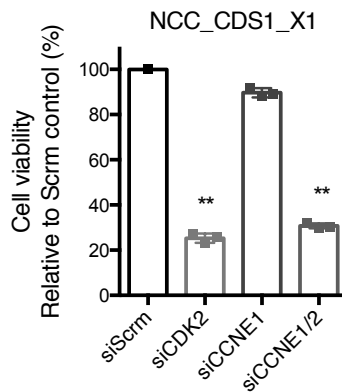

S7E

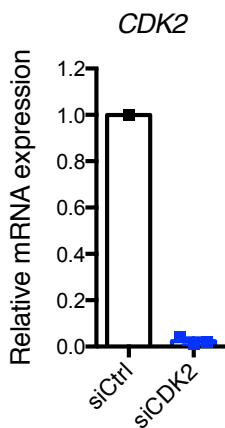

S7F

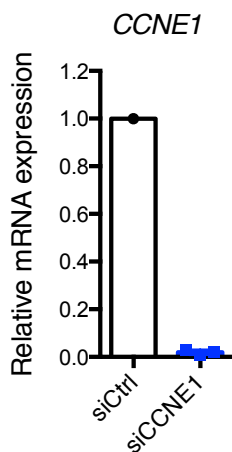

S7G

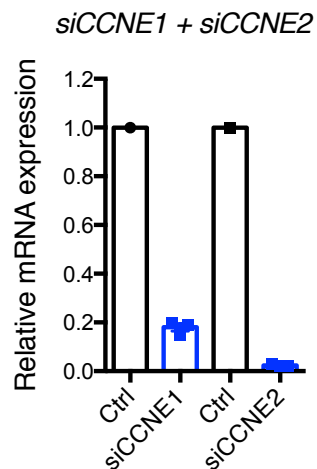

**Supplemental Figure 7. Genetic inhibition of the CCNE-CDK2 complex decreases CIC-DUX4 tumor growth**

A) Five day crystal violet assay of NCC\_CDS1\_X1 cells treated with palbociclib.  
B) Transwell invasion assay comparing CIC-DUX4 expressing NCC\_CDS1\_X1 cells with either siCtrl or siCDK2. Error bars represent SEM. C) Relative cell number of NCC\_CDS1\_X1 cells following knockdown of CDK2, CCNE1, and combination CCNE1 and CCNE2 compared to scramble control. \*\*p-value = 0.0001, one-way ANOVA. Error bars represent SEM. D) Relative cell viability (cell titer glo assay) of NCC\_CDS1\_X1 cells following knockdown of *CDK2*, *CCNE1*, and combination *CCNE1* and *CCNE2* compared to scramble control. \*\*p-value = 0.0001, one-way ANOVA. Error bars represent SEM. E) Relative mRNA expression following *CDK2* (E), *CCNE1* (F), or dual *CCNE1* and *CCNE2* (G) knockdown compared to scramble control. performed in triplicate. Error bars represent SEM.

Supplemental Figure 8. *CCNE1* is a conserved CIC-DUX4 target gene.

S8A

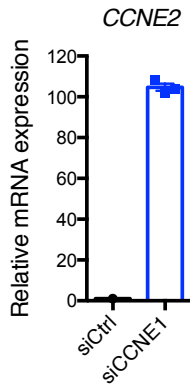

S8B

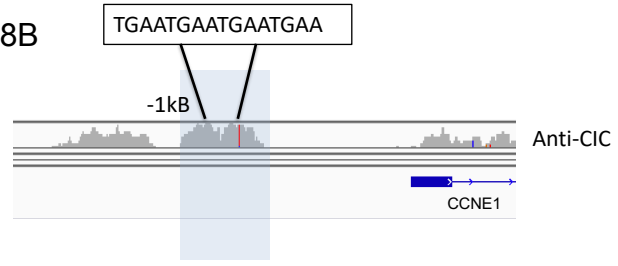

S8C

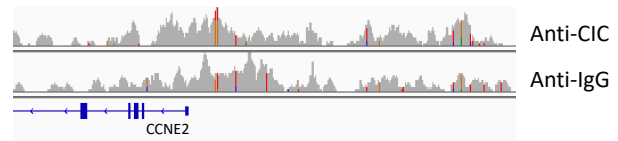

S8D

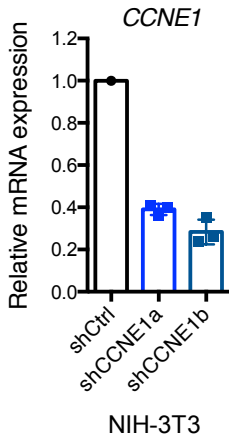

S8E

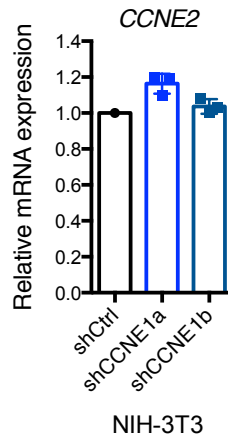

S8F

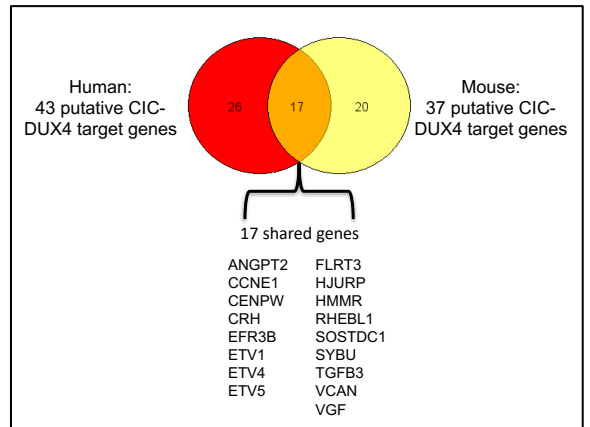



### **Supplemental Figure 8. *CCNE1* is a conserved CIC-DUX4 target gene**

A) Relative *CCNE2* mRNA expression following *CCNE1* knockdown compared to scramble control in NCC\_CDS1\_X1 cells. B) CIC-DUX4 binding sites and ChIP-Seq peaks on the *CCNE1* promoter in NCC\_CDS1\_X1 cells. C) ChIP-Seq analysis of the *CCNE2* promoter region comparing anti-CIC and anti-IgG immunoprecipitations. Relative *CCNE1* (D) and *CCNE2* (E) mRNA expression following *CCNE1* knockdown compared to scramble control in CIC-DUX4 expressing NIH-3T3 cells. Performed in triplicate. Error bars represent SEM. F) Venn diagram comparing human (n=43) and mouse (n=37) putative CIC-DUX4 targets demonstrating 17 shared genes.

| Table S1. Downregulated genes upon CIC-DUX4 KD |           |             |         |
|------------------------------------------------|-----------|-------------|---------|
| GeneSymbol                                     | ID.x      | adj.P.Val.x | logFC.x |
| ACVRL1                                         | 94_at     | 0.007062    | -3.33   |
| ADAMTS9                                        | 56999_at  | 0.031875    | -2.59   |
| AGR2                                           | 10551_at  | 0.04047     | -2.39   |
| ANGPT2                                         | 285_at    | 0.012833    | -6.14   |
| APOBEC3B                                       | 9582_at   | 0.012637    | -4.44   |
| ATAD2                                          | 29028_at  | 0.004162    | -3.75   |
| AURKA                                          | 6790_at   | 0.004515    | -4.32   |
| AURKB                                          | 9212_at   | 0.007277    | -4.21   |
| BIRC5                                          | 332_at    | 0.008102    | -4.5    |
| BLM                                            | 641_at    | 0.003109    | -4.95   |
| BMP4                                           | 652_at    | 0.023837    | -2.33   |
| BPI                                            | 671_at    | 0.003356    | -3.16   |
| BTBD11                                         | 121551_at | 0.00563     | -2.61   |
| BUB1B                                          | 701_at    | 0.010978    | -4.34   |
| CALB2                                          | 794_at    | 0.012137    | -4.42   |
| CCDC3                                          | 83643_at  | 0.012416    | -2.26   |
| CCNE1                                          | 898_at    | 0.003636    | -2.8    |
| CCNE2                                          | 9134_at   | 0.005342    | -4.54   |
| CDC20                                          | 991_at    | 0.005393    | -5.89   |
| CDC45                                          | 8318_at   | 0.011462    | -3.58   |
| CDC6                                           | 990_at    | 0.004857    | -4.91   |
| CDC7                                           | 8317_at   | 0.006338    | -3.34   |
| CDCA5                                          | 113130_at | 0.004319    | -4.61   |
| CDCA7                                          | 83879_at  | 0.010166    | -2.53   |
| CDCA8                                          | 55143_at  | 0.001873    | -4.1    |
| CDH4                                           | 1002_at   | 0.034988    | -2.41   |
| CDK1                                           | 983_at    | 0.003935    | -4.76   |
| CDT1                                           | 81620_at  | 0.007726    | -3.61   |
| CENPE                                          | 1062_at   | 0.011145    | -5.25   |
| CENPK                                          | 64105_at  | 0.006043    | -3.38   |
| CENPM                                          | 79019_at  | 0.00155     | -4.27   |
| CENPU                                          | 79682_at  | 0.004162    | -4.18   |
| CENPW                                          | 387103_at | 0.012751    | -3.86   |
| CEP152                                         | 22995_at  | 0.009666    | -2.51   |
| CHAF1A                                         | 10036_at  | 0.003652    | -3.26   |
| CHTF18                                         | 63922_at  | 0.00155     | -2.26   |
| CIT                                            | 11113_at  | 0.002885    | -4.09   |
| CKAP2L                                         | 150468_at | 0.008394    | -4.29   |
| COLEC11                                        | 78989_at  | 0.008331    | -3.57   |
| CRH                                            | 1392_at   | 0.011093    | -3.61   |
| CYP251                                         | 29785_at  | 0.010176    | -2.04   |
| DDIAS                                          | 220042_at | 0.007279    | -4      |
| DEPDC1B                                        | 55789_at  | 0.011113    | -4.63   |
| DIO3                                           | 1735_at   | 0.004162    | -6.6    |
| DLGAP5                                         | 9787_at   | 0.022892    | -5.46   |
| DTL                                            | 51514_at  | 0.003109    | -5.03   |
| E2F8                                           | 79733_at  | 0.005526    | -3.16   |
| EFR3B                                          | 22979_at  | 0.008838    | -2.94   |
| ELOVL6                                         | 79071_at  | 0.005324    | -3.2    |
| ENPP2                                          | 5168_at   | 0.004882    | -2.55   |
| ETV1                                           | 2115_at   | 0.018832    | -3.31   |
| ETV4                                           | 2118_at   | 0.021186    | -4.72   |
| ETV5                                           | 2119_at   | 0.005048    | -3.12   |
| EXO1                                           | 9156_at   | 0.011245    | -4.1    |
| EZH2                                           | 2146_at   | 0.031747    | -2.91   |
| FAM64A                                         | 54478_at  | 0.020893    | -6.69   |
| FAM83D                                         | 81610_at  | 0.002189    | -4.52   |
| FANCI                                          | 55215_at  | 0.008394    | -3.8    |
| FEN1                                           | 2237_at   | 0.007656    | -2.91   |
| FGFBP3                                         | 143282_at | 0.006618    | -2.46   |
| FIGNL1                                         | 63979_at  | 0.004486    | -2.1    |
| FLRT3                                          | 23767_at  | 0.003727    | -2.25   |
| FOS                                            | 2353_at   | 0.00463     | -4.18   |
| FOXM1                                          | 2305_at   | 0.011748    | -5.11   |
| GALNT16                                        | 57452_at  | 0.005088    | -5.62   |
| GINS2                                          | 51659_at  | 0.007521    | -4.47   |
| GLCC1                                          | 113263_at | 0.00976     | -2.14   |
| GTSE1                                          | 51512_at  | 0.006618    | -4.04   |
| HAUS8                                          | 93323_at  | 0.013919    | -2.9    |
| HCRTR2                                         | 3062_at   | 0.004162    | -5.45   |
| HELLS                                          | 3070_at   | 0.004486    | -3.56   |
| HEY1                                           | 23462_at  | 0.003927    | -4.1    |
| HJURP                                          | 55355_at  | 0.025418    | -5.11   |
| HMMR                                           | 3161_at   | 0.003877    | -5.53   |
| ID1                                            | 3397_at   | 0.00472     | -2.57   |
| ID2                                            | 3398_at   | 0.002189    | -3.2    |
| IL18R1                                         | 8809_at   | 0.008314    | -4.7    |
| IRX1                                           | 79192_at  | 0.00363     | -2.73   |
| KIAA0101                                       | 9768_at   | 0.003356    | -4.75   |
| KIF11                                          | 3832_at   | 0.004515    | -3.82   |
| KIF14                                          | 9928_at   | 0.004083    | -4.44   |
| KIF15                                          | 56992_at  | 0.007378    | -4.13   |
| KIF18B                                         | 146909_at | 0.005006    | -4.4    |

| GeneSymbol   | ID.x         | adj.P.Val.x | logFC.x |
|--------------|--------------|-------------|---------|
| KIF20A       | 10112_at     | 0.009833    | -5.66   |
| KIF2C        | 11004_at     | 0.005093    | -4.16   |
| KIF4A        | 24137_at     | 0.009833    | -5.44   |
| KIFC1        | 3833_at      | 0.009228    | -3.94   |
| LBH          | 81606_at     | 0.040084    | -2.48   |
| LHX1         | 3975_at      | 0.028595    | -2.46   |
| LINC00473    | 90632_at     | 0.001154    | -4.96   |
| LINC00911    | 100996280_at | 0.009146    | -2.55   |
| LMNB1        | 4001_at      | 0.00463     | -4.74   |
| LOC100506718 | 100506718_at | 0.003575    | -3.92   |
| LPCAT1       | 79888_at     | 0.004857    | -3.07   |
| LRRC1        | 55227_at     | 0.003109    | -2.11   |
| MAD2L1       | 4085_at      | 0.008314    | -3.86   |
| MAFB         | 9935_at      | 0.003784    | -2.73   |
| MAN1A1       | 4121_at      | 0.010507    | -2.58   |
| MCM10        | 55388_at     | 0.003109    | -4.5    |
| MCM2         | 4171_at      | 0.013357    | -3.68   |
| MCM3         | 4172_at      | 0.004162    | -2.67   |
| MCM5         | 4174_at      | 0.010507    | -2.87   |
| MCM7         | 4176_at      | 0.011905    | -2.83   |
| MFSD2A       | 84879_at     | 0.005205    | -3.17   |
| MND1         | 84057_at     | 0.002189    | -4      |
| MYBPC2       | 4606_at      | 0.007542    | -3.54   |
| MYH13        | 8735_at      | 0.029464    | -2.44   |
| MYH8         | 4626_at      | 0.040752    | -2.37   |
| NCAPG        | 64151_at     | 0.013519    | -4.6    |
| NCAPH        | 23397_at     | 0.005479    | -5.27   |
| NEIL3        | 55247_at     | 0.001154    | -3.99   |
| NID2         | 22795_at     | 0.002189    | -4.01   |
| NPTX2        | 4885_at      | 0.009557    | -3.3    |
| NRARP        | 441478_at    | 0.042544    | -3.04   |
| NUF2         | 83540_at     | 0.005212    | -4.83   |
| NUSAP1       | 51203_at     | 0.013043    | -5.16   |
| ORC6         | 23594_at     | 0.003432    | -3.52   |
| PCSK1        | 5122_at      | 0.001325    | -6.01   |
| PIK3AP1      | 118788_at    | 0.005009    | -4.42   |
| PKNOX2       | 63876_at     | 0.004316    | -3.14   |
| PLSCR1       | 5359_at      | 0.003356    | -3.55   |
| POLA1        | 5422_at      | 0.030571    | -2.74   |
| POLE         | 5426_at      | 0.008477    | -6.38   |
| POLE2        | 5427_at      | 0.003356    | -4.21   |
| POLQ         | 10721_at     | 0.012423    | -4.37   |
| PRICKLE1     | 144165_at    | 0.026937    | -2.05   |
| PRKAR2B      | 5577_at      | 0.009036    | -2.87   |
| RAD51AP1     | 10635_at     | 0.008116    | -3.51   |
| RAD54L       | 8438_at      | 0.005324    | -3.32   |
| RFC5         | 5985_at      | 0.006166    | -3.59   |
| RHEBL1       | 121268_at    | 0.007408    | -2.99   |
| RMI2         | 116028_at    | 0.018761    | -3.81   |
| RNASEH2A     | 10535_at     | 0.006572    | -4.2    |
| RRM2         | 6241_at      | 0.004316    | -5.01   |
| SAPCD2       | 89958_at     | 0.002189    | -5.37   |
| SCARA5       | 286133_at    | 0.003356    | -3.02   |
| SGOL2        | 151246_at    | 0.001154    | -3.99   |
| SHC3         | 53358_at     | 0.003636    | -3.61   |
| SHC4         | 399694_at    | 0.003968    | -2.6    |
| SKA3         | 221150_at    | 0.006618    | -3.09   |
| SLC2A3       | 6515_at      | 0.003652    | -2.34   |
| SLC6A15      | 55117_at     | 0.003356    | -3.88   |
| SNX30        | 401548_at    | 0.002612    | -2.16   |
| SOSTDC1      | 25928_at     | 0.009789    | -2.29   |
| SPAG5        | 10615_at     | 0.010978    | -5.39   |
| SPC25        | 57405_at     | 0.005529    | -4.56   |
| SPP1         | 6696_at      | 0.004882    | -4.6    |
| STARD8       | 9754_at      | 0.009054    | -3.07   |
| SULT1E1      | 6783_at      | 0.003567    | -4.15   |
| SYBU         | 55638_at     | 0.010005    | -3.29   |
| TCF19        | 6941_at      | 0.008106    | -4.08   |
| TESC         | 54997_at     | 0.018179    | -2.5    |
| TET1         | 80312_at     | 0.003575    | -3.26   |
| TGFB3        | 7043_at      | 0.012097    | -3.59   |
| TGFBR3       | 7049_at      | 0.002885    | -4.52   |
| THSD7B       | 80731_at     | 0.024784    | -2.91   |
| TRIP13       | 9319_at      | 0.009126    | -3.57   |
| TSPAN11      | 441631_at    | 0.003655    | -2.84   |
| TYRP1        | 7306_at      | 0.014058    | -2.19   |
| UBE2C        | 11065_at     | 0.013755    | -4.68   |
| VCAN         | 1462_at      | 0.003216    | -2.64   |
| VGFB         | 7425_at      | 0.02702     | -2.02   |
| VGLL2        | 245806_at    | 0.012671    | -2.88   |
| ZNF804A      | 91752_at     | 0.010166    | -3.97   |
| ZWINT        | 11130_at     | 0.004826    | -4.51   |

| GeneSymbol | ID.x         | adj.P.Val.x | logFC.x |
|------------|--------------|-------------|---------|
| ABI3BP     | 25890_at     | 0.011435    | 3.71    |
| ADAM12     | 8038_at      | 0.004483    | 3.62    |
| ADAMTS6    | 11174_at     | 0.002189    | 3.08    |
| AGO3       | 192669_at    | 0.020917    | 2.1     |
| AOX1       | 316_at       | 0.002004    | 4.48    |
| ARL4C      | 10123_at     | 0.001555    | 6.02    |
| ARNT2      | 9915_at      | 0.034627    | 2.12    |
| ATP8B1     | 5205_at      | 0.010206    | 3.62    |
| ATP9A      | 10079_at     | 0.013976    | 2.31    |
| C14orf28   | 122525_at    | 0.007866    | 3.64    |
| C15orf48   | 84419_at     | 0.001325    | 5.51    |
| C2CD2      | 25966_at     | 0.007278    | 2.87    |
| C3AR1      | 719_at       | 0.002994    | 3.6     |
| C3orf52    | 79669_at     | 0.010507    | 2.31    |
| CA8        | 767_at       | 0.009272    | 2.08    |
| CARD6      | 84674_at     | 0.00946     | 2.01    |
| CD274      | 29126_at     | 0.005144    | 5.49    |
| CEMIP      | 57214_at     | 0.000776    | 6.45    |
| CEMIP2     | 23670_at     | 0.009444    | 3.72    |
| CLDN1      | 9076_at      | 0.003221    | 5.57    |
| COL1A1     | 1277_at      | 0.007378    | 3.2     |
| COL3A1     | 1281_at      | 0.012092    | 3.23    |
| COLEC12    | 81035_at     | 0.002885    | 3.83    |
| CPA3       | 1359_at      | 0.0032      | 3.03    |
| CTHRC1     | 115908_at    | 0.004515    | 3.76    |
| CYP24A1    | 1591_at      | 0.018761    | 2.72    |
| DKK1       | 22943_at     | 0.003356    | 3.86    |
| DUBR       | 344595_at    | 0.014541    | 2.67    |
| DUSP3      | 1845_at      | 0.00463     | 2.76    |
| EDN1       | 1906_at      | 0.009119    | 7.26    |
| EGR1       | 1958_at      | 0.001325    | 2.74    |
| ELL2       | 22936_at     | 0.003356    | 2.01    |
| FGF1       | 2246_at      | 0.016402    | 2.21    |
| FILIP1L    | 11259_at     | 0.003567    | 4.48    |
| FRMD6      | 122786_at    | 0.011341    | 2.62    |
| FST        | 10468_at     | 0.016401    | 2.88    |
| GAPLINC    | 100505592_at | 0.008105    | 4.72    |
| GAS6       | 2621_at      | 0.001325    | 3.46    |
| GBP1       | 2633_at      | 0.005038    | 3.14    |
| GBP2       | 2634_at      | 0.015941    | 3.69    |
| GDF15      | 9518_at      | 0.003833    | 4.01    |
| GLIPR1     | 11010_at     | 0.006676    | 2.8     |
| GLS        | 2744_at      | 0.006551    | 2.22    |
| GLTRD2     | 83468_at     | 0.006474    | 2.67    |
| HHAT       | 55733_at     | 0.015729    | 2.72    |
| HIST1H1C   | 3006_at      | 0.009715    | 2.61    |
| HIST1H4H   | 8365_at      | 0.01762     | 2.9     |
| HMOX1      | 3162_at      | 0.002539    | 4.04    |
| HOXC6      | 3223_at      | 0.011744    | 2.02    |
| HTR2B      | 3357_at      | 0.001921    | 6.44    |
| IGFBP3     | 3486_at      | 0.007468    | 4.13    |
| IGFBP5     | 3488_at      | 0.011744    | 3.68    |
| IGFBP7     | 3490_at      | 0.002885    | 6.37    |
| KCTD12     | 115207_at    | 0.002562    | 2.98    |
| KRTAP2-3   | 730755_at    | 0.000776    | 7.95    |
| LAMB3      | 3914_at      | 0.028202    | 3.73    |
| LINC00460  | 728192_at    | 0.016475    | 4.54    |
| LOC151760  | 151760_at    | 0.019194    | 2.14    |
| LRRC17     | 10234_at     | 0.008883    | 4.18    |
| LTBP2      | 4053_at      | 0.015508    | 2.32    |
| LYPD6B     | 130576_at    | 0.003948    | 3.4     |
| MAP3K7CL   | 56911_at     | 0.006045    | 5.04    |
| C3HC4      | 57574_at     | 0.003609    | 3.91    |
| MBNL1-AS1  | 401093_at    | 0.004162    | 3.5     |
| MGLL       | 11343_at     | 0.022738    | 3.16    |
| MMP3       | 4314_at      | 0.007666    | 3.63    |
| MOK        | 5891_at      | 0.014633    | 3.1     |
| MOXD1      | 26002_at     | 0.010302    | 3.95    |
| MSTN       | 2660_at      | 0.004395    | 4.97    |
| MYBL1      | 4603_at      | 0.006166    | 2.15    |
| MYLK       | 4638_at      | 0.003425    | 2.85    |
| MYO1E      | 4643_at      | 0.007754    | 3.22    |
| MYOF       | 26509_at     | 0.007773    | 2.67    |
| NABP1      | 64859_at     | 0.005731    | 3.21    |
| NEDD4      | 4734_at      | 0.012185    | 2.45    |
| NMRK1      | 54981_at     | 0.018801    | 3.34    |
| NOG        | 9241_at      | 0.003786    | 5.68    |
| OLFML3     | 56944_at     | 0.026353    | 2.08    |
| OPTN       | 10133_at     | 0.002189    | 2.45    |
| OXTR       | 5021_at      | 0.004832    | 5.81    |
| PALMD      | 54873_at     | 0.002189    | 2.35    |
| PLA2G4C    | 8605_at      | 0.003257    | 4.86    |
| PLAT       | 5327_at      | 0.0216      | 3.99    |
| PLAU       | 5328_at      | 0.008102    | 5.58    |
| POSTN      | 10631_at     | 0.004316    | 3.59    |
| PSG4       | 5672_at      | 0.017603    | 3.78    |
| PSG5       | 5673_at      | 0.011842    | 4.25    |
| PTPRJ      | 5795_at      | 0.004515    | 2.59    |
| RCAN1      | 1827_at      | 0.041172    | 3.44    |
| RGS7       | 6000_at      | 0.004882    | 3.62    |
| S100A2     | 6273_at      | 0.003567    | 2.44    |
| SCG5       | 6447_at      | 0.002521    | 3.41    |
| SERPINE1   | 5054_at      | 0.019986    | 4.8     |
| SLC22A4    | 6583_at      | 0.001154    | 4.19    |
| SULF1      | 23213_at     | 0.008102    | 3.37    |
| SYTL2      | 54843_at     | 0.010628    | 2.77    |
| TGFB1      | 7045_at      | 0.021631    | 4.2     |
| TIPARP     | 25976_at     | 0.003356    | 2.76    |
| TMEM154    | 201799_at    | 0.008612    | 3.03    |
| TMEM200A   | 114801_at    | 0.003784    | 4.91    |
| TMEM40     | 55287_at     | 0.001154    | 5.42    |
| TNFRSF11B  | 4982_at      | 0.000776    | 5.89    |
| TPD52L1    | 7164_at      | 0.004634    | 2.7     |
| WNT5B      | 81029_at     | 0.002019    | 3.7     |
| ZYX        | 7791_at      | 0.019158    | 2.43    |

| Table S3. Putative CIC-DUX4 target genes - human |           |                                                           |
|--------------------------------------------------|-----------|-----------------------------------------------------------|
| GeneSymbol                                       | ID        | Description                                               |
| ANGPT2                                           | 285_at    | angiopoietin 2                                            |
| BLM                                              | 641_at    | Bloom syndrome, RecQ helicase-like                        |
| CCNE1                                            | 898_at    | cyclin E1                                                 |
| CDC45                                            | 8318_at   | cell division cycle 45                                    |
| CENPE                                            | 1062_at   | centromere protein E, 312kDa                              |
| CENPM                                            | 79019_at  | centromere protein M                                      |
| CENPW                                            | 387103_at | centromere protein W                                      |
| CRH                                              | 1392_at   | corticotropin releasing hormone                           |
| CYP2S1                                           | 29785_at  | cytochrome P450, family 2, subfamily S, polypeptide 1     |
| DLGAP5                                           | 9787_at   | discs, large (Drosophila) homolog-associated protein 5    |
| EFR3B                                            | 22979_at  | EFR3 homolog B ( <i>S. cerevisiae</i> )                   |
| ELOVL6                                           | 79071_at  | ELOVL fatty acid elongase 6                               |
| ETV1                                             | 2115_at   | ets variant 1                                             |
| ETV4                                             | 2118_at   | ets variant 4                                             |
| ETV5                                             | 2119_at   | ets variant 5                                             |
| FAM83D                                           | 81610_at  | family with sequence similarity 83, member D              |
| FANCI                                            | 55215_at  | Fanconi anemia, complementation group I                   |
| FGFBP3                                           | 143282_at | fibroblast growth factor binding protein 3                |
| FLRT3                                            | 23767_at  | fibronectin leucine rich transmembrane protein 3          |
| GLCCI1                                           | 113263_at | glucocorticoid induced transcript 1                       |
| GTSE1                                            | 51512_at  | G-2 and S-phase expressed 1                               |
| HELLS                                            | 3070_at   | helicase, lymphoid-specific                               |
| HJURP                                            | 55355_at  | Holliday junction recognition protein                     |
| HMMR                                             | 3161_at   | hyaluronan-mediated motility receptor (RHAMM)             |
| KIF4A                                            | 24137_at  | kinesin family member 4A                                  |
| KIFC1                                            | 3833_at   | kinesin family member C1                                  |
| MAD2L1                                           | 4085_at   | MAD2 mitotic arrest deficient-like 1 (yeast)              |
| MCM10                                            | 55388_at  | minichromosome maintenance complex component 10           |
| MCM7                                             | 4176_at   | minichromosome maintenance complex component 7            |
| NEIL3                                            | 55247_at  | nei endonuclease VIII-like 3 ( <i>E. coli</i> )           |
| PKNOX2                                           | 63876_at  | PBX/knotted 1 homeobox 2                                  |
| POLQ                                             | 10721_at  | polymerase (DNA directed), theta                          |
| RAD51AP1                                         | 10635_at  | RAD51 associated protein 1                                |
| RHEBL1                                           | 121268_at | Ras homolog enriched in brain like 1                      |
| RRM2                                             | 6241_at   | ribonucleotide reductase M2                               |
| SOSTDC1                                          | 25928_at  | sclerostin domain containing 1                            |
| SULT1E1                                          | 6783_at   | sulfotransferase family 1E, estrogen-preferring, member 1 |
| SYBU                                             | 55638_at  | syntabulin (syntaxin-interacting)                         |
| TGFB3                                            | 7043_at   | transforming growth factor, beta 3                        |
| TGFBR3                                           | 7049_at   | transforming growth factor, beta receptor III             |
| VCAN                                             | 1462_at   | versican                                                  |
| VGFB                                             | 7425_at   | VGFB nerve growth factor inducible                        |
| ZWINT                                            | 11130_at  | ZW10 interactor, kinetochore protein                      |

| Table S4. Putative CIC-DUX4 target genes - mouse |           |                                                         |
|--------------------------------------------------|-----------|---------------------------------------------------------|
| GeneSymbol                                       | ID        | Description                                             |
| ANGPT2                                           | 285_at    | angiopoietin 2                                          |
| ATAD2                                            | 29028_at  | ATPase family, AAA domain containing 2                  |
| AURKB                                            | 9212_at   | aurora kinase B                                         |
| BTBD11                                           | 121551_at | BTB (POZ) domain containing 11                          |
| CCNE1                                            | 898_at    | cyclin E1                                               |
| CENPU                                            | 79682_at  | MLF1 interacting protein                                |
| CENPW                                            | 387103_at | centromere protein W                                    |
| CHAF1A                                           | 10036_at  | chromatin assembly factor 1, subunit A (p150)           |
| CIT                                              | 11113_at  | citron (rho-interacting, serine/threonine kinase 21)    |
| CKAP2L                                           | 150468_at | cytoskeleton associated protein 2-like                  |
| CRH                                              | 1392_at   | corticotropin releasing hormone                         |
| DEPDC1B                                          | 55789_at  | DEP domain containing 1B                                |
| EFR3B                                            | 22979_at  | EFR3 homolog B ( <i>S. cerevisiae</i> )                 |
| ETV1                                             | 2115_at   | ets variant 1                                           |
| ETV4                                             | 2118_at   | ets variant 4                                           |
| ETV5                                             | 2119_at   | ets variant 5                                           |
| FLRT3                                            | 23767_at  | fibronectin leucine rich transmembrane protein 3        |
| FOS                                              | 2353_at   | FBJ murine osteosarcoma viral oncogene homolog          |
| HJURP                                            | 55355_at  | Holliday junction recognition protein                   |
| HMMR                                             | 3161_at   | hyaluronan-mediated motility receptor (RHAMM)           |
| IL18R1                                           | 8809_at   | interleukin 18 receptor 1                               |
| KIF18B                                           | 146909_at | kinesin family member 18B                               |
| MCM5                                             | 4174_at   | minichromosome maintenance complex component 5          |
| MYH13                                            | 8735_at   | myosin, heavy chain 13, skeletal muscle                 |
| NID2                                             | 22795_at  | nidogen 2 (osteonidogen)                                |
| ORC6                                             | 23594_at  | origin recognition complex, subunit 6                   |
| PRICKLE1                                         | 144165_at | prickle homolog 1 ( <i>Drosophila</i> )                 |
| RHEBL1                                           | 121268_at | Ras homolog enriched in brain like 1                    |
| SCARA5                                           | 286133_at | scavenger receptor class A, member 5 (putative)         |
| SHC4                                             | 399694_at | SHC (Src homology 2 domain containing) family, member 4 |
| SOSTDC1                                          | 25928_at  | sclerostin domain containing 1                          |
| SYBU                                             | 55638_at  | syntabulin (syntaxin-interacting)                       |
| TESC                                             | 54997_at  | tescalcin                                               |
| TGFB3                                            | 7043_at   | transforming growth factor, beta 3                      |
| TSPAN11                                          | 441631_at | tetraspanin 11                                          |
| VCAN                                             | 1462_at   | versican                                                |
| VGF                                              | 7425_at   | VGF nerve growth factor inducible                       |
